# Supplementary material for: Influence of major BCR-ABL1 transcript subtype on outcome in patients with chronic myeloid leukemia in chronic phase treated frontline with nilotinib
Source: PubMed Central journal article supplement (PMC7335668; doi:10.18632/oncotarget.27652), 2020-06-30
Supplement: oncotarget-11-2560-s001.pdf [file oncotarget-11-2560-s001.pdf]

## Influence of major *BCR-ABL1* transcript subtype on outcome in patients with chronic myeloid leukemia in chronic phase treated frontline with nilotinib

### SUPPLEMENTARY MATERIALS

**Supplementary Table 1: Multivariate analysis to identify factors predictive of MR<sup>4.0</sup>**

| <i>Univariate analysis</i>                         | OR        | [95% CI OR]        | MMR at 12 months<br>N (%) | No MMR at 12 months<br>N (%) | <i>p</i> =        |
|----------------------------------------------------|-----------|--------------------|---------------------------|------------------------------|-------------------|
| <b>Male</b>                                        |           |                    |                           |                              |                   |
| Yes                                                | 0.49      | [0.24–1.00]        | 31 (45.6)                 | 36 (63.2)                    | .05               |
| No                                                 |           |                    | 37 (54.6)                 | 21 (36.8)                    |                   |
| <b>Splenomegaly</b>                                |           |                    |                           |                              |                   |
| Yes                                                | 0.21      | [0.08–0.57]        | 6 (8.8)                   | 18 (31.6)                    | .002              |
| No                                                 |           |                    | 62 (91.2)                 | 39 (68.4)                    |                   |
| <b>WBC count (&gt; 150 × 10<sup>3</sup>/μL)</b>    |           |                    |                           |                              |                   |
| Yes                                                | 0.30      | [0.14–0.64]        | 18 (26.5)                 | 31 (54.4)                    | .002              |
| No                                                 |           |                    | 50 (73.5)                 | 26 (45.6)                    |                   |
| <b>PLT count (&gt; 300 × 10<sup>3</sup>/μL)</b>    |           |                    |                           |                              |                   |
| Yes                                                | 2.68      | [1.27–5.67]        | 50 (73.5)                 | 29 (50.9)                    | .009              |
| No                                                 |           |                    | 18 (26.5)                 | 28 (49.1)                    |                   |
| <b>Hemoglobin (&gt; 120 g/L)</b>                   |           |                    |                           |                              |                   |
| Yes                                                | 2.44      | [1.17–5.08]        | 36 (52.9)                 | 18 (31.6)                    | .02               |
| No                                                 |           |                    | 31 (47.1)                 | 39 (68.4)                    |                   |
| <b>High ELTS score</b>                             |           |                    |                           |                              |                   |
| Yes                                                | 0.30      | [0.10–0.90]        | 5 (7.4)                   | 12 (21.1)                    | .03               |
| No                                                 |           |                    | 63 (92.6)                 | 45 (78.9)                    |                   |
| <b>High Sokal score</b>                            |           |                    |                           |                              |                   |
| Yes                                                | 0.87      | [0.38–2.00]        | 29 (23.2)                 | 14 (24.6)                    | .74               |
| No                                                 |           |                    | 96 (76.8)                 | 43 (75.4)                    |                   |
| <b>ACA or variant translocation</b>                |           |                    |                           |                              |                   |
| Yes                                                | 2.01      | [0.71–5.68]        | 13 (19.4)                 | 6 (10.7)                     | .18               |
| No                                                 |           |                    | 54 (80.6)                 | 50 (89.3)                    |                   |
| <b>Transcript e14a2,<br/>alone or co-expressed</b> |           |                    |                           |                              |                   |
| Yes                                                | 2.17      | [1.05–4.48]        | 46 (67.6)                 | 28 (49.1)                    | .04               |
| No                                                 |           |                    | 22 (32.4)                 | 29 (50.9)                    |                   |
| <b>Multivariate analysis</b>                       | <b>OR</b> | <b>[95% CI OR]</b> |                           |                              | <b><i>p</i> =</b> |
| Male                                               | 0.74      | [0.31–1.81]        |                           |                              | .51               |
| Splenomegaly                                       | 0.27      | [0.07–1.06]        |                           |                              | .06               |
| WBC count                                          | 0.58      | [0.22–1.54]        |                           |                              | .27               |
| Platelets                                          | 2.58      | [1.03–6.47]        |                           |                              | .04               |
| Hemoglobin                                         | 1.84      | [0.76–4.47]        |                           |                              | .18               |
| ACA or variant translocation                       | 3.04      | [0.91–10.10]       |                           |                              | .07               |
| ELTS score                                         | 1.81      | [0.38–8.53]        |                           |                              | .45               |
| e14a2                                              | 2.15      | [0.93–4.97]        |                           |                              | .07               |

Abbreviations: OR, odds ratio; ACA, additional chromosome abnormalities in Ph<sup>+</sup> cells; EUTOS, European Treatment and Outcome Study; ELTS; PLT, platelets; WBC, white blood cells. Variables with *p* values inferior to 0.20 in univariate analysis were included in the multivariate model.
